# Supplementary material
Source: HighWire-hosted journal article supplement (https://www.jrheum.org/highwire/filestream/40764/field_highwire_adjunct_files/0/201688DataSuppl.pdf)
Supplement: 201688DataSuppl.pdf [file 201688DataSuppl.pdf]

## Supplemental Tables

**Supplementary Table 1.** Total household Income per year (Canadian dollars).

|                     | <b>CATCH (n=2878)</b> | <b>OBRI (n=3734)</b>                       | <b>RHUMADATA® (n=2890)</b>                 | <b>Rheum4U (n=709)</b>                    |
|---------------------|-----------------------|--------------------------------------------|--------------------------------------------|-------------------------------------------|
| ≤ \$50,000          | 611/2878<br>(21.2%)   | < \$20,000<br>289/3541<br>(8.2%)           | ≤ \$19,999<br>512/2890<br>(17.7%)          | \$5,000 -<br>30/693<br>(4.3%)             |
| > \$50,000          | 956/2878<br>(33.2%)   | \$20,000 -<br>384/3541<br>(10.8%)          | \$20,000 - \$39,999<br>565/2890<br>(19.6%) | \$19,999 -<br>61/693<br>(8.8%)            |
| Refuse to<br>answer | 858/2878<br>(29.8%)   | \$34,999 -<br>403/3541<br>(11.4%)          | \$40,000 - \$59,999<br>360/2890<br>(12.5%) | \$20,000 -<br>57/693<br>(8.2%)            |
| Missing             | 453/2878<br>(15.7%)   | \$49,999 -<br>512/3541<br>(14.5%)          | \$60,000 - \$79,999<br>168/2890<br>(5.8%)  | \$35,999 -<br>56/693<br>(8.1%)            |
|                     |                       | \$74,999 -<br>1016/3541<br>(28.7%)         | \$80,000 - \$99,999<br>77/2890 (2.7%)      | \$52,000 -<br>56/693<br>(8.1%)            |
|                     |                       | ≥ \$75,000<br>495/3541<br>(14.0%)          | ≥ \$100,000<br>101/2890<br>(3.5%)          | \$66,999 -<br>41/693<br>(5.9%)            |
|                     |                       | Refuse to<br>answer<br>442/3541<br>(12.5%) | Missing<br>1107/2890<br>(38.3%)            | \$81,999 -<br>44/693<br>(6.3%)            |
|                     |                       |                                            |                                            | \$111,999 -<br>39/693<br>(5.6%)           |
|                     |                       |                                            |                                            | \$112,000 -<br>27/693<br>(3.9%)           |
|                     |                       |                                            |                                            | \$127,999 -<br>27/693<br>(3.9%)           |
|                     |                       |                                            |                                            | \$128,000 -<br>14/693<br>(2.0%)           |
|                     |                       |                                            |                                            | 143,999 -<br>57/693<br>(8.2%)             |
|                     |                       |                                            |                                            | \$144,000 -<br>184/693<br>(26.6%)         |
|                     |                       |                                            |                                            | \$159,999 -<br>14/693<br>(2.0%)           |
|                     |                       |                                            |                                            | \$160,000 -<br>57/693<br>(8.2%)           |
|                     |                       |                                            |                                            | \$175,999 -<br>184/693<br>(26.6%)         |
|                     |                       |                                            |                                            | ≥ \$176,000<br>184/693<br>(26.6%)         |
|                     |                       |                                            |                                            | Refuse to<br>answer<br>184/693<br>(26.6%) |

“Refuse to answer” was denoted as a specific survey question option some cohorts. Missingness of any response (where found) is also reported.

**Supplementary Table 2.** Treatment patterns for moderate-high disease activity\*.

|                            | <b>CATCH</b>   | <b>OBRI</b>   | <b>RHUMADATA®</b> | <b>Rheum4U</b> |
|----------------------------|----------------|---------------|-------------------|----------------|
| Initial DMARD therapy      | N= 1306        | N = 454       | N = 399           | N = 55         |
| Monotherapy                | 763/1306 (58%) | 260/454 (57%) | 170/399 (43%)     | 18/55 (33%)    |
| Methotrexate               | 527/1306 (40%) | 184/454 (41%) | 118/399 (30%)     | 10/55 (18%)    |
| SC                         | 270/527 (51%)  | 35/184 (19%)  | 9/118 (8%)        | 4/10 (40%)     |
| Oral                       | 257/527 (49%)  | 149/184 (81%) | 109/118 (92%)     | 6/10 (60%)     |
| Hydroxychloroquine (HCQ)   | 212/1306 (16%) | 50/454 (11%)  | 51/399 (13%)      | 7/55 (13%)     |
| Other DMARD mono           | 24/1306 (2%)   | 26/454 (6%)   | 1/399 (<1%)       | 1/55 (2%)      |
| Sulfasalazine (SSZ)        | Not available  | 23/454 (5%)   | 1/399 (<1%)       | 1/55 (2%)      |
| Leflunomide (LEF)          | Not available  | 3/454 (1%)    | 0/399 (0%)        | 0/55 (0%)      |
| Dual therapy               | 451/1306 (35%) | 147/454 (32%) | 226/399 (57%)     | 31/55 (56%)    |
| MTX + HCQ                  | 398/1306 (31%) | 95/454 (21%)  | 217/399 (54%)     | 26/55 (47%)    |
| MTX + SSZ                  | 11/1306 (1%)   | 17/454 (4%)   | 1/399 (<1%)       | 1/55 (2%)      |
| MTX + LEF                  | 22/1306 (2%)   | 2/454 (0%)    | 1/399 (<1%)       | 1/55 (2%)      |
| Other DMARD Dual Therapy   | 20/1306 (2%)   | 33/454 (7%)   | 7/399 (2%)        | 3/55 (5%)      |
| Triple therapy             | 82/1306 (6%)   | 47/454 (10%)  | 3/399 (1%)        | 4/55 (7%)      |
| MTX + HCQ + SSZ            | 82/1306 (6%)   | 33/454 (7%)   | 2/399 (1%)        | 2/55 (4%)      |
| Other DMARD Triple Therapy | 0/1306 (0%)    | 14/454 (3%)   | 1/399 (<1%)       | 2/55 (4%)      |
| bDMARD or tsDMARD          | 10/1306 (1%)   | Not available | 0/399 (0%)        | 2/55 (4%)      |
| Anti-TNF +/- csDMARD       | 7/1306 (1%)    | Not available | 0/399 (0%)        | 1/55 (2%)      |
| Non-TNF +/- csDMARD        | 3/1306 (0%)    | Not available | 0/399 (0%)        | 1/55 (2%)      |

Biologic Disease Modifying anti-Rheumatic Drugs (bDMARD); Conventional Synthetic Disease Modifying anti-Rheumatic Drugs (csDMARD); Targeted Synthetic Disease Modifying anti-Rheumatic Drugs (tsDMARD)

\* based on a Disease Activity Score- 28 (DAS28) score of >3.2 or Clinical Disease Activity Index (CDAI) score of >10

**Supplementary Table 3.** DMARD therapies that patients must fail to meet provincial insurance program eligibility criteria for biologic or targeted synthetic DMARDs.

|                          | AB | BC | MB | NB | NL | NS | ON | PEI | QC | SK | YT |
|--------------------------|----|----|----|----|----|----|----|-----|----|----|----|
| <b>Monotherapy</b>       |    |    |    |    |    |    |    |     |    |    |    |
| Any 3 DMARDs             |    |    | X  |    |    |    |    |     |    |    |    |
| MTX (oral or parenteral) |    |    | O  |    |    |    | X  |     | X  | X  |    |
| MTX (parenteral)         | X  | X  |    | X  | X  | X  |    | X   |    |    | X  |
| LFD                      | X  | O  | O  |    |    |    | O  |     |    | X  | O  |
| Sulfasalazine            |    |    |    |    |    |    |    |     |    |    | O  |
| Azathioprine             |    |    |    |    |    |    |    |     |    |    | O  |
| Any DMARD except MTX     |    |    |    |    |    |    |    |     | O  | X  |    |
| <b>Dual Therapy</b>      |    |    |    |    |    |    |    |     |    |    |    |
| Any DMARD combination    |    |    | X  |    |    | X  | O  |     | O  |    | X  |
| MTX + any DMARD          | X  |    |    | I  | I  |    |    | I   |    |    |    |
| MTX + LFD                |    | O  |    |    |    |    | O  |     |    |    |    |
| <b>Triple Therapy</b>    |    |    |    |    |    |    |    |     |    |    |    |
| MTX + any 2 DMARDs       |    |    |    | X  | X  | X  |    | X   |    |    |    |
| MTX + LFD + HCQ          |    | O  |    |    |    |    | O  |     |    |    |    |

Canadian Provinces and Territories: Alberta (AB), British Columbia (BC), Manitoba (MB), New Brunswick (NB), Newfoundland and Labrador (NL), Nova Scotia (NS), Ontario (ON), Prince Edward Island (PEI), Quebec (QC), Saskatchewan (SK), Yukon (YT). Northwest Territories and Nunavut have been omitted from the table as data was not available

Notes: X = mandatory criteria; O = one of multiple options to meet criteria; I = mandatory where patient cannot take triple therapy
